# Supplementary material
Source: PubMed Central journal article supplement (PMC6250068)
Supplement: NIHMS1508173-supplement-1.pdf [file NIHMS1508173-supplement-1.pdf]

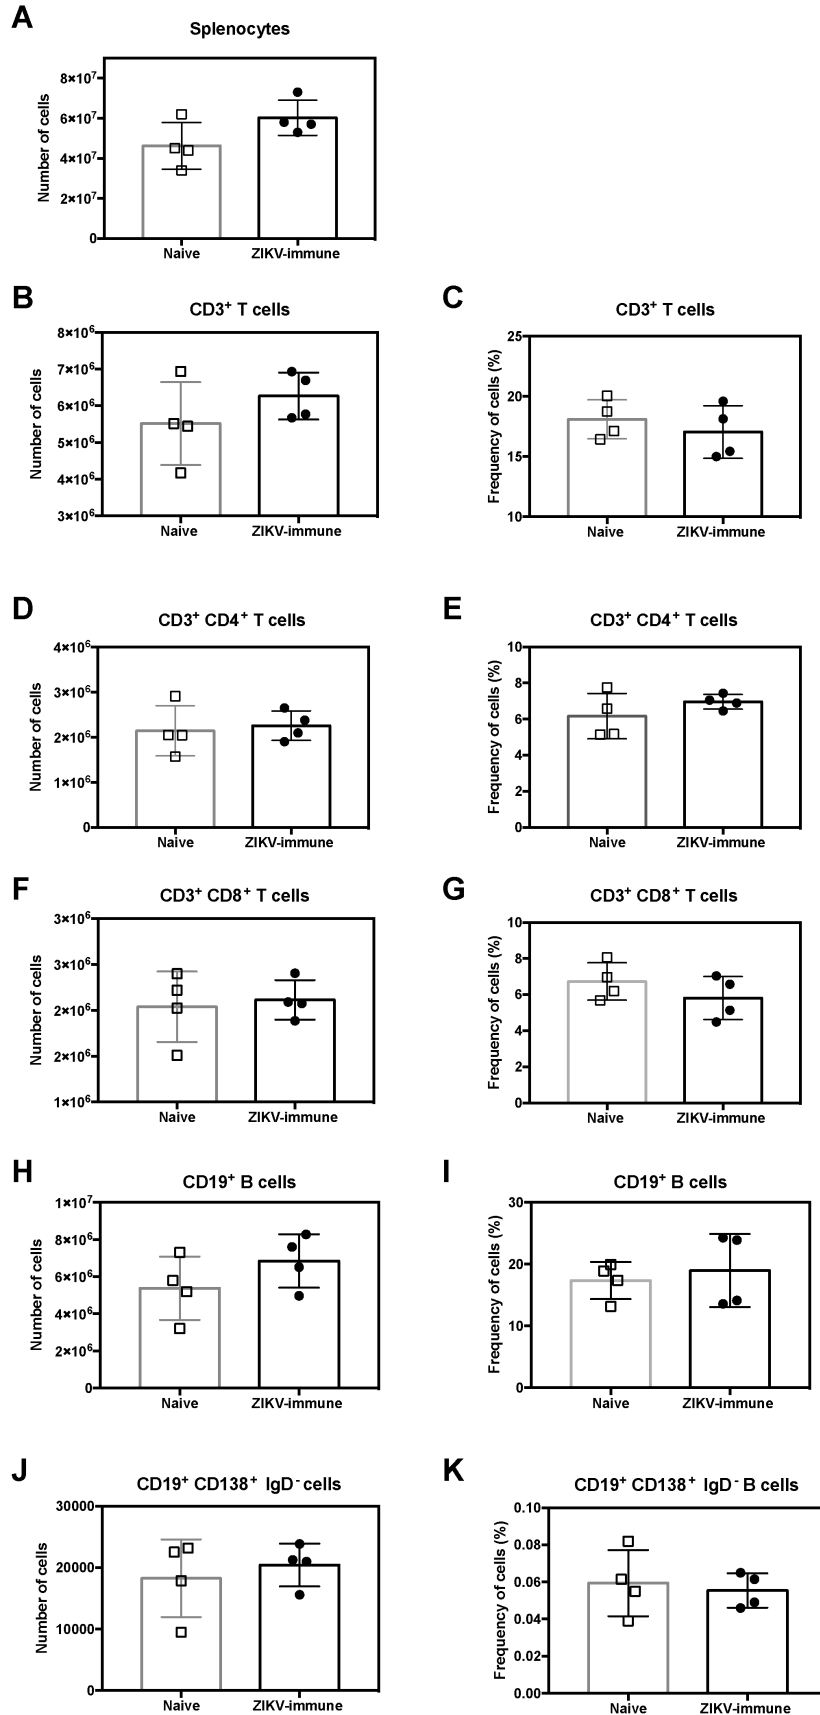

**Figure S1, Related to Figure 1. Immune cell populations in the spleen from pups born to ZIKV-immune mothers and naïve mothers.** Spleens were harvested from 4- to 5-week-old *LysMCre+Ifnar1<sup>fl/fl</sup>* mice born to mothers infected with ZIKV strain SD001 ( $10^6$  FFU via retro-orbital route) for 8 months ( $n=2$ ) or naïve mothers ( $n=1$ ). Splenocytes were analyzed for CD3, CD4, CD8, CD19, CD138, and IgD expression via flow cytometry. **(A)** Total number of live splenocytes, **(B)** Number of CD3<sup>+</sup> splenocytes, **(C)** Frequency of CD3<sup>+</sup> splenocytes, **(D)** Number of CD4<sup>+</sup> T cells, **(E)** Frequency of CD4<sup>+</sup> T cells **(F)** Number of CD8<sup>+</sup> T cells, **(G)** Frequency of CD8<sup>+</sup> T cells, **(H)** Number of CD19<sup>+</sup> B cells, **(I)** Frequency of CD19<sup>+</sup> B cells, **(J)** Number of CD19<sup>+</sup>CD138<sup>+</sup>IgD<sup>-</sup> plasma cells, **(K)** Frequency of CD19<sup>+</sup>CD138<sup>+</sup>IgD<sup>-</sup> plasma cells. An unpaired student's t test was performed and no statistically significant differences were observed.

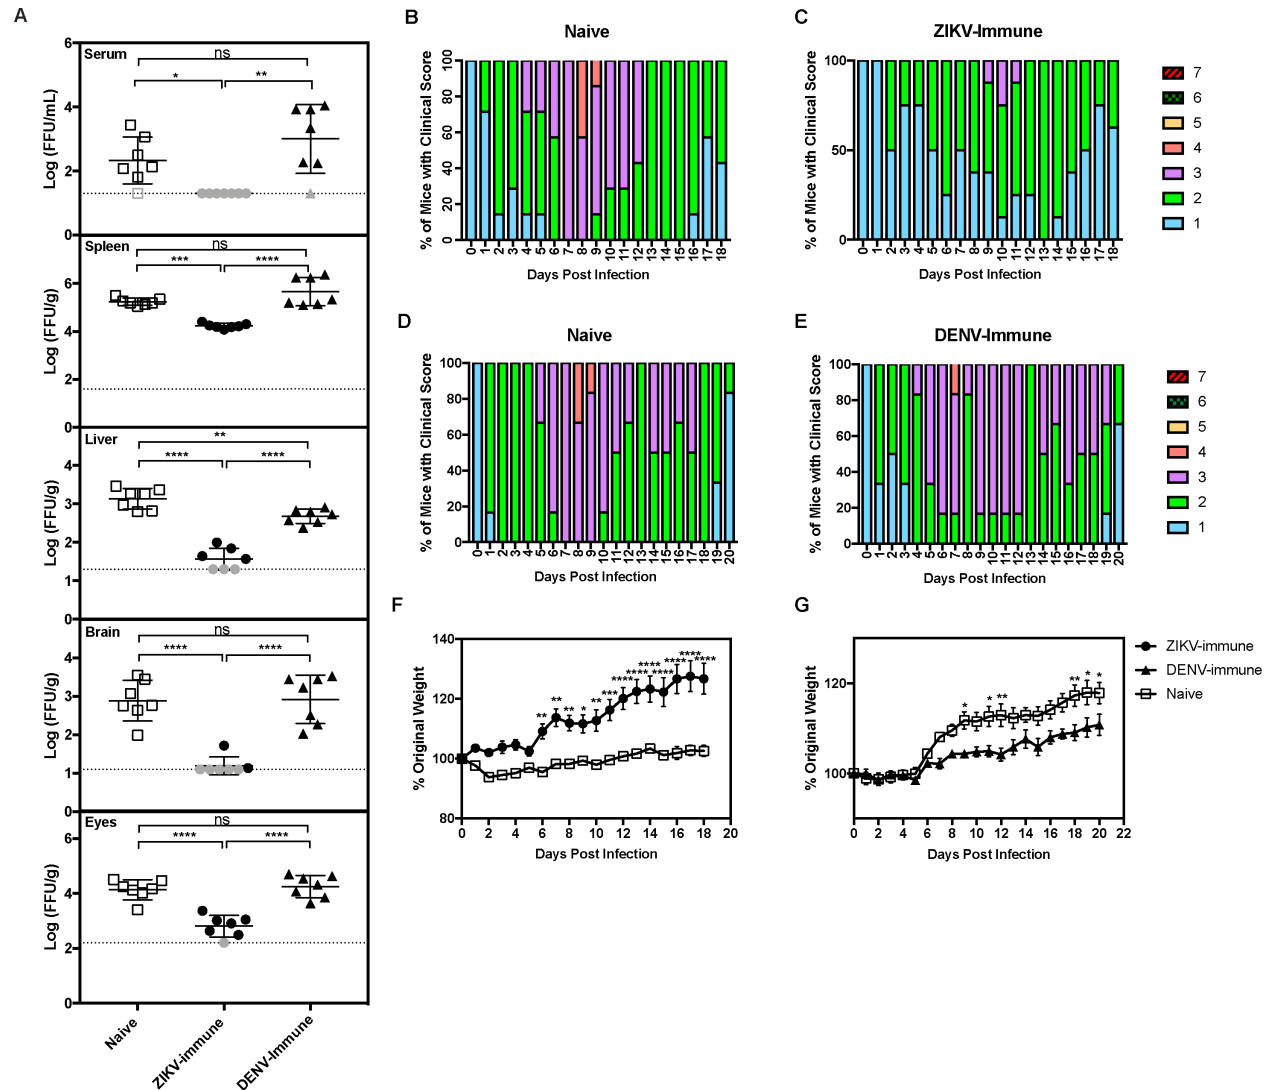

**Figure S2, Related to Figures 1. Decreased ZIKV tissue burden and ZIKV-induced clinical disease manifestations in mice born to ZIKV-immune mothers but not DENV-immune mothers.** Four- to 5-week-old *LysMCre<sup>+</sup>Ifnar1<sup>fl/fl</sup>* mice born to mothers previously infected with ZIKV strain SD001 ( $10^6$  FFU via retro-orbital route), mothers previously infected with DENV2 strain S221 ( $5 \times 10^5$  FFU via tail vein), or naïve mothers were challenged via retro-orbital route with  $10^5$  FFU of ZIKV strain SD001. **(A)** Mice were sacrificed 3 days p.i. and serum, spleen, liver, brain, and eyes were harvested. Samples were titrated for infectious ZIKV via focus forming assay. Open squares represent pups

( $n=7$ ) from naïve mothers ( $n=2$ ), closed circles represent pups ( $n=7$ ) born to ZIKV-immune mothers infected for 2 months ( $n=2$ ), and closed triangles represent pups ( $n=7$ ) born to DENV-immune mothers infected for 2-3 months ( $n=2$ ). Dotted line indicates limit of detection. **(B)** Clinical scores of pups ( $n=7$ ) from naïve mothers ( $n=2$ ), **(C)** Clinical scores of pups ( $n=6$ ) born to ZIKV-immune mothers infected for 6-7 months ( $n=2$ ), **(D)** Clinical scores of pups ( $n=7$ ) from naïve mothers ( $n=2$ ), **(E)** Clinical scores of pups ( $n=8$ ) born to DENV2-immune mothers infected for 2-3 months ( $n=2$ ), **(F)** Weight loss of pups born to ZIKV-immune mothers, and **(G)** Weight loss of pups born to DENV-immune mothers. Data represent pooled data from two independent experiments and are expressed as mean  $\pm$  standard error of mean. One-way ANOVA was used for all comparisons in **(A)**. Unpaired Student's *t* test of groups for each day in **(F)** and **(G)**. \* $P < 0.05$ , \*\*  $P < 0.01$ , \*\*\*  $P < 0.001$ , \*\*\*\*  $P < 0.0001$ .

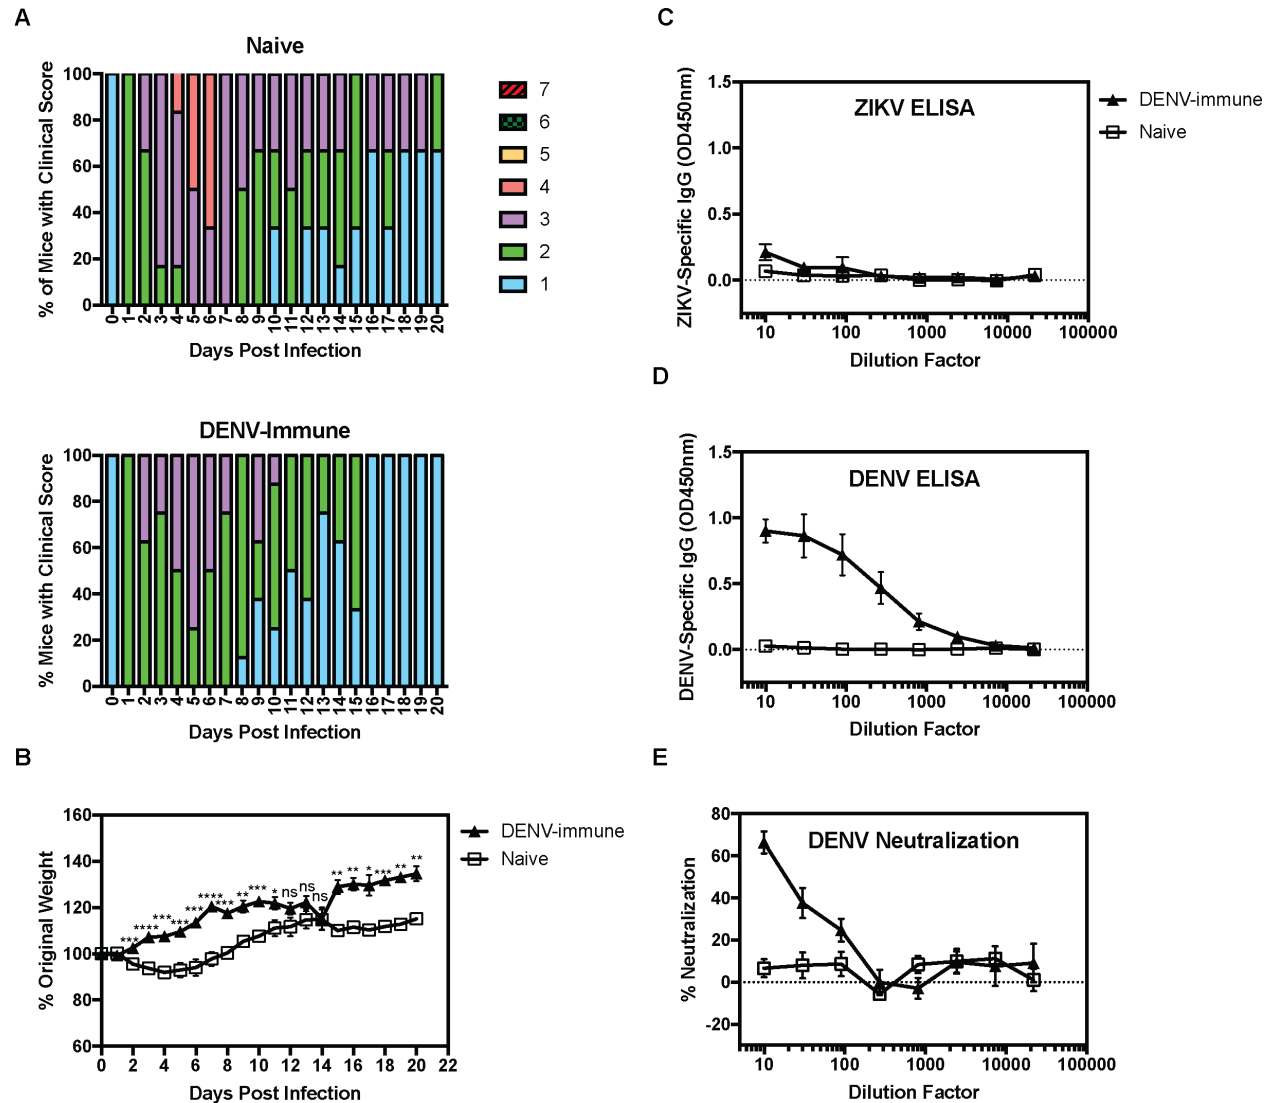

**Figure S3, Related to Figures 1 and 2. Mice born to DENV-immune mothers have reduced DENV disease compared to mice born to naïve mothers, and sera from mice born to DENV-immune mothers do not bind ZIKV.** Four- to 5-week-old *LysMCre<sup>+</sup>Ifnar1<sup>fl/fl</sup>* mice born to mothers previously infected with DENV2 strain S221 ( $5 \times 10^5$  FFU via tail vein) or to naïve mothers were challenged with  $10^6$  FFU of DENV2 strain S221 via tail vein injection. **(A)** Clinical scores of pups ( $n=6$ ) from naïve mothers ( $n=2$ ), Clinical scores of pups ( $n=12$ ) born to DENV2-immune mothers infected for 8-11 months ( $n=3$ ), and **(B)** Weight loss of pups born to DENV2-immune mothers. Serum

samples were collected from 4- to 5-week-old *LysMCre+Ifnar1<sup>fl/fl</sup>* mice born to mothers previously infected with DENV2 strain S221 ( $5 \times 10^5$  FFU via tail vein) or naïve mothers. Open squares represent pups ( $n=10$ ) from naïve mothers ( $n=2$ ) and closed triangles represent pups ( $n=12$ ) born to DENV2-immune mothers infected for 8-11 months ( $n=3$ ). (C) anti-ZIKV IgG and (D) anti-DENV IgG were detected via ELISA. (E) Neutralization capacity was assessed against DENV2 S221 via U937-DC-SIGN cells and a flow cytometry-based assay (Wen et al., 2017). Dotted line indicates limit of detection for ELISA and 0% neutralization for the neutralization assay. Data represent pooled data from two independent experiments and are expressed as mean  $\pm$  standard error of mean. \*  $P < 0.05$ , \*\*  $P < 0.01$ , \*\*\*  $P < 0.001$ , \*\*\*\*  $P < 0.0001$ . Unpaired Student's t test of groups for each day in (B).

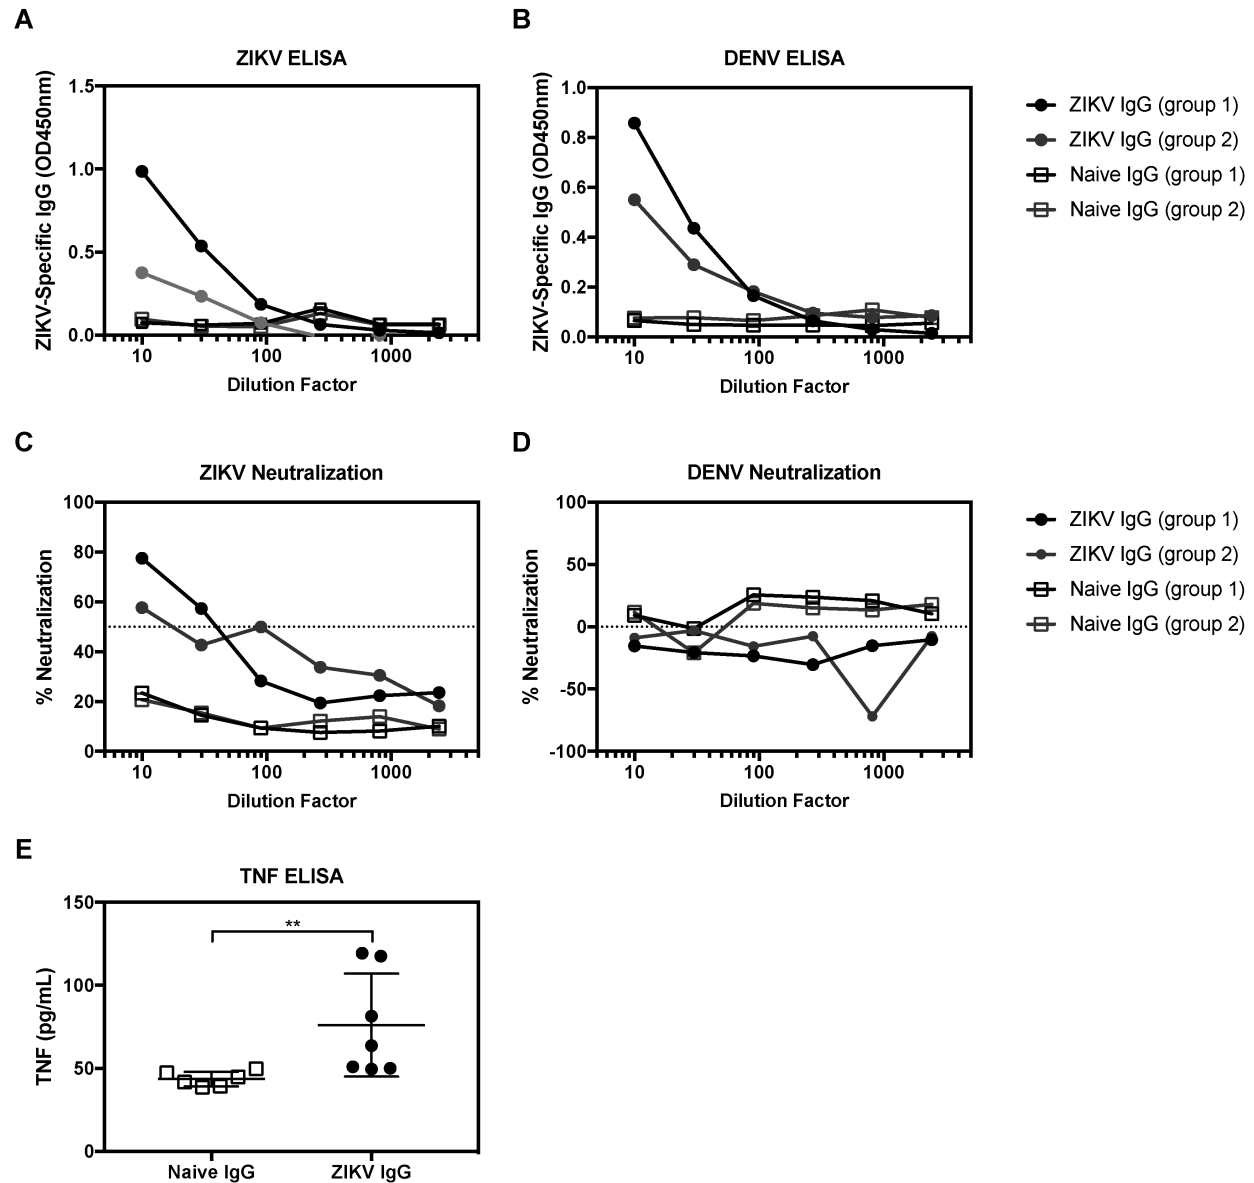

**Figure S4, Related to Figure 3. IgG isolated from pups born to ZIKV-immune mothers bind both ZIKV and DENV2 but neutralize ZIKV and not DENV2. IgG isolated and pooled from 23 mice born to ZIKV-immune mothers or 23 mice born to naïve mothers (group 1) and 13 mice born to ZIKV-immune mothers and 9 mice born to naïve mothers (group 2) for the IgG preparations used in passive transfer experiments in Figure 3 was assessed for binding and neutralization capabilities. (A) anti-ZIKV IgG and (B) anti-DENV IgG were detected via ELISA. Neutralization capacity was assessed against (C) ZIKV**

SD001 and **(D)** DENV S221 via U937-DC-SIGN cells and a flow cytometry-based assay (Wen et al., 2017). Dotted line indicates limit of detection for ELISA and 50% or 0% neutralization for the neutralization assay. Data are expressed as mean +/- standard error of mean. **(E)** Day 3 p.i. serum samples from mice that received 145 µg of IgG and then challenged with  $2 \times 10^5$  FFU of DENV2 strain S221 via tail vein injection (same mice used in Figure 3) were assessed for TNF levels using a R&D systems Quantikine ELISA kit for mouse TNF. Data are pooled from 2 independent experiments with  $n=6-8$  mice group, and are expressed as mean +/- standard error of mean. Mann-Whitney test,  $**P < 0.01$ .
